# Supplementary material for: Weight Loss and Heart Failure: A Nationwide Study of Gastric Bypass Surgery Versus Intensive Lifestyle Treatment
Source: PubMed Central journal article supplement — Circulation. 2017 Apr 24;135(17):1577–85. doi: 10.1161/CIRCULATIONAHA.116.025629 (PMC5404408; doi:10.1161/circulationaha.116.025629), 2017-04-24
Supplement: cir-135-1577-s001.pdf [file cir-135-1577-s001.pdf]

## SUPPLEMENTAL MATERIAL

### Weight loss and heart failure: a nationwide study of gastric bypass surgery versus intensive lifestyle treatment

Johan Sundström,<sup>1</sup> Gustaf Bruze,<sup>2</sup> Johan Ottosson,<sup>3</sup> Claude Marcus,<sup>4</sup> Ingmar Näslund,<sup>3</sup> Martin Neovius<sup>2</sup>

<sup>1</sup>Department of Medical Sciences, Uppsala University, and Uppsala Clinical Research center (UCR). Uppsala, Sweden

<sup>2</sup>Department of Medicine, Solna, Clinical Epidemiology Unit, Karolinska Institutet, Stockholm, Sweden

<sup>3</sup>Department of Surgery, Faculty of Medicine and Health, Örebro University, Örebro, Sweden

<sup>4</sup>Department of Clinical Science, Intervention and Technology, Karolinska Institutet, Stockholm, Sweden

#### Table of Contents

| Item                                   | Description                                                                           | Page |
|----------------------------------------|---------------------------------------------------------------------------------------|------|
| Supplemental Methods                   | Weight-loss program                                                                   | 2    |
|                                        | Statistical methods                                                                   | 2    |
| Supplemental Table 1                   | Variable sources and definitions                                                      | 3    |
| Supplemental Table 2                   | Baseline characteristics in persons with complete data vs those with any missing data | 4    |
| Supplemental Table 3                   | Baseline characteristics of sample re-weighted also by one-year BMI                   | 5    |
| Supplemental Figure 1                  | Flow chart for definition of the study sample                                         | 6    |
| Supplemental figure titles and legends | Supplemental Figure 1                                                                 | 7    |

## Supplemental Methods

### *Weight-loss program*

The VLCD treatment was a liquid-based formula diet of 500kcal/day for 3-10 weeks (125kcal/sachet, 4 sachets/day, approved as sole source VLCD by the Swedish National Food Agency) followed by 2-8 weeks gradual introduction of normal food. Early introduction of normal food occurred if patients were satisfied with the achieved weight loss or reached BMI<25. In June, 2009, the program was changed to 600kcal/day for 3 weeks followed by 800kcal/day for up to 9 weeks.

The LCD treatment included 2 calorie-restricted normal food meals and 2 formula-diet meal replacement sachets per day providing a total caloric intake of about 1200-1500kcal. After the weight-loss phase, patients entered a 9-month weight maintenance program of exercise (circuit training at the center 2-3 times/week for 30-45 minutes, and pedometer use to encourage walking), dietary advice, and behavioral therapy (a structured program of 20 1-hour group sessions, initiated during the weight-loss phase). There were also face-to-face counselling sessions throughout the program.

### *Statistical methods*

Variables included in the propensity score analysis were baseline variables age, systolic blood pressure, smoking, previous myocardial infarction, previous atrial fibrillation, weight, BMI, educational level, marital status, income, sex, antihypertensive drugs, lipid-lowering drugs, antidiabetic drugs, previous substance abuse, previous valve disease, and treatment year, with non-linear modelling of some variables, and interaction terms for several variables including BMI.

**Supplemental Table 1. Variable sources and definitions**

| <b>Variables obtained from nationwide health registries</b> |                                                                                                                                                                                                                                                                                                                                                                                                                                                                                                                                                                                  | <b>Source</b>                                         |
|-------------------------------------------------------------|----------------------------------------------------------------------------------------------------------------------------------------------------------------------------------------------------------------------------------------------------------------------------------------------------------------------------------------------------------------------------------------------------------------------------------------------------------------------------------------------------------------------------------------------------------------------------------|-------------------------------------------------------|
| Atrial fibrillation                                         | ICD-10: I48.9, diagnosed in ambulatory or in-patient care                                                                                                                                                                                                                                                                                                                                                                                                                                                                                                                        | National Patient Register                             |
| Myocardial infarction                                       | ICD-10: I21, diagnosed in in-patient care                                                                                                                                                                                                                                                                                                                                                                                                                                                                                                                                        |                                                       |
| Valve disease                                               | ICD-10: I34, I35, I36, I37, diagnosed in in-patient care                                                                                                                                                                                                                                                                                                                                                                                                                                                                                                                         |                                                       |
| Heart failure                                               | ICD-10: I50, diagnosed in in-patient care, only as main cause of hospitalization                                                                                                                                                                                                                                                                                                                                                                                                                                                                                                 |                                                       |
| Substance abuse                                             | ICD-10: F10-F19, diagnosed in ambulatory or in-patient care                                                                                                                                                                                                                                                                                                                                                                                                                                                                                                                      |                                                       |
| Lipid-lowering drug treatment                               | ATC: C10                                                                                                                                                                                                                                                                                                                                                                                                                                                                                                                                                                         | Prescribed Drug Register<br>(dispensed prescriptions) |
| Antidiabetic drug treatment                                 | ATC: A10                                                                                                                                                                                                                                                                                                                                                                                                                                                                                                                                                                         |                                                       |
| Aspirin treatment                                           | ATC: B01AC06                                                                                                                                                                                                                                                                                                                                                                                                                                                                                                                                                                     |                                                       |
| Thyroid hormone treatment                                   | ATC: H03A                                                                                                                                                                                                                                                                                                                                                                                                                                                                                                                                                                        |                                                       |
| Antihypertensive drug treatment                             | ATC: C02, C03A, C03B, C03EA01, C07 except C07AA07, C08C, C09                                                                                                                                                                                                                                                                                                                                                                                                                                                                                                                     |                                                       |
| Beta-receptor blocker treatment                             | ATC: C07 except C07AA07                                                                                                                                                                                                                                                                                                                                                                                                                                                                                                                                                          |                                                       |
| Calcium antagonist treatment                                | ATC: C08C                                                                                                                                                                                                                                                                                                                                                                                                                                                                                                                                                                        |                                                       |
| RAAS blocker treatment                                      | ATC: C09                                                                                                                                                                                                                                                                                                                                                                                                                                                                                                                                                                         |                                                       |
| Thiazide diuretic treatment                                 | ATC: C03A, C03B, C03EA01                                                                                                                                                                                                                                                                                                                                                                                                                                                                                                                                                         |                                                       |
| Loop diuretic treatment                                     | ATC: C03C                                                                                                                                                                                                                                                                                                                                                                                                                                                                                                                                                                        |                                                       |
| Income level                                                | Mean of previous 2 calendar years from income & taxation register                                                                                                                                                                                                                                                                                                                                                                                                                                                                                                                | Income and Taxation Register                          |
| Education level                                             |                                                                                                                                                                                                                                                                                                                                                                                                                                                                                                                                                                                  | Education Register                                    |
| Age                                                         |                                                                                                                                                                                                                                                                                                                                                                                                                                                                                                                                                                                  | Total Population Register                             |
| Sex                                                         |                                                                                                                                                                                                                                                                                                                                                                                                                                                                                                                                                                                  |                                                       |
| Marital status                                              |                                                                                                                                                                                                                                                                                                                                                                                                                                                                                                                                                                                  |                                                       |
| Emigration date                                             |                                                                                                                                                                                                                                                                                                                                                                                                                                                                                                                                                                                  |                                                       |
| Death date                                                  |                                                                                                                                                                                                                                                                                                                                                                                                                                                                                                                                                                                  | Causes of Death Register                              |
| <b>Variables obtained in the SOReg or Itrim registries</b>  |                                                                                                                                                                                                                                                                                                                                                                                                                                                                                                                                                                                  |                                                       |
| Baseline weight, waist circumference & body-mass index      | Screening weight was used for the SOReg participants, since almost all are treated with VLCD in the months before surgery. Weight at start of intervention was used for Itrim participants.                                                                                                                                                                                                                                                                                                                                                                                      | SOReg Itrim                                           |
| Intervention date                                           | Date of first visit in Itrim. Date of surgery in SOReg.                                                                                                                                                                                                                                                                                                                                                                                                                                                                                                                          |                                                       |
| Systolic blood pressure                                     | According to the Itrim protocol, coffee and smoking should be avoided 30 minutes before the measurement. Blood pressures were measured in the left upper arm using an Omron 1240 oscillometric device with the cuff at heart level, in the sitting position with the back against the backrest and without crossed legs, after 5 minutes' rest. If the first recording was elevated (SBP $\geq$ 140 mmHg or DBP $\geq$ 90 mmHg), a second measurement was obtained; the mean of those two measurements recorded. Registered in the SOReg protocol, without further instructions. |                                                       |
| Smoking                                                     | Structured questionnaire in Itrim and SOReg.                                                                                                                                                                                                                                                                                                                                                                                                                                                                                                                                     |                                                       |
| Weight & waist circumference during follow-up               | Structured protocol in Itrim and SOReg.                                                                                                                                                                                                                                                                                                                                                                                                                                                                                                                                          |                                                       |
| Percent body fat during follow-up                           | Structured protocol in Itrim, using a Tanita body impedance meter.                                                                                                                                                                                                                                                                                                                                                                                                                                                                                                               |                                                       |

**Supplemental Table 2.** Baseline characteristics in persons with complete data vs those with any missing data

|                                               | Complete data<br>(n= 23,700) | Any missing data<br>(n=15,805) | Difference<br>complete – missing |
|-----------------------------------------------|------------------------------|--------------------------------|----------------------------------|
| Age (years)                                   | 41.4 (41.2 to 41.5)          | 41.3 (41.1 to 41.5)            | 0.1 (-0.2 to 0.3)                |
| Male sex                                      | 23.3 (22.7 to 23.8)          | 23.7 (23.0 to 24.4)            | -0.4 (-1.3 to 0.5)               |
| Weight (kg)                                   | 118.7 (118.5 to 118.9)       | 119.8 (119.5 to 120.1)         | -1.1 (-1.5 to -0.7)              |
| Baseline body-mass index (kg/m <sup>2</sup> ) | 41.4 (41.3 to 41.4)          | 41.6 (41.5 to 41.6)            | -0.2 (-0.3 to -0.1)              |
| Systolic blood pressure (mmHg)                | 134.4 (134.2 to 134.6)       | 135.7 (134.7 to 136.7)         | -1.3 (-2.3 to -0.3)              |
| Married (%)                                   | 43.7 (43.1 to 44.3)          | 43.3 (42.5 to 44.1)            | 0.4 (-0.6 to 1.4)                |
| Current smoker (%)                            | 16.5 (16.0 to 16.9)          | 17.5 (15.9 to 19.1)            | -1.1 (-2.7 to 0.6)               |
| Prior myocardial infarction (%)               | 0.9 (0.7 to 1.0)             | 1.2 (1.0 to 1.3)               | -0.3 (-0.5 to -0.1)              |
| Prior atrial fibrillation (%)                 | 0.9 (0.8 to 1.0)             | 1.1 (0.9 to 1.3)               | -0.2 (-0.4 to -0.0)              |
| Prior valve disease (%)                       | 0.1 (0.0 to 0.1)             | 0.2 (0.1 to 0.3)               | -0.1 (-0.2 to -0.0)              |
| Prior substance abuse (%)                     | 0.9 (0.8 to 1.0)             | 0.8 (0.6 to 0.9)               | 0.1 (-0.1 to 0.3)                |
| Lipid-lowering drugs (%)                      | 12.3 (11.9 to 12.7)          | 13.4 (12.9 to 14.0)            | -1.2 (-1.9 to -0.5)              |
| Antidiabetic drugs (%)                        | 12.4 (12.0 to 12.8)          | 14.2 (13.7 to 14.8)            | -1.9 (-2.6 to -1.2)              |
| Antihypertensive drugs (%)                    | 28.4 (27.9 to 29.0)          | 29.5 (28.7 to 30.2)            | -1.0 (-1.9 to -0.1)              |
| Education                                     |                              |                                |                                  |
| <10 years (%)                                 | 16.3 (15.8 to 16.7)          | 17.2 (16.7 to 17.8)            | -1.0 (-1.6 to -0.4)              |
| 10 to 12 years (%)                            | 60.5 (60.0 to 61.0)          | 60.7 (60.2 to 61.2)            | -0.3 (-0.4 to -0.1)              |
| >12 years (%)                                 | 23.3 (22.8 to 23.8)          | 22.0 (21.4 to 22.6)            | 1.2 (0.5 to 1.9)                 |
| Income (1000 USD/year)                        | 31.1 (30.9 to 31.4)          | 30.9 (30.6 to 31.2)            | 0.2 (-0.2 to 0.6)                |

Data are means or percent and difference between persons with complete data on all variables and those with any missing data (95% confidence intervals) from an inverse probability-weighted sample.

**Supplemental Table 3.** Baseline characteristics of sample re-weighted also by one-year BMI

|                                               | Surgery<br>(n=22,694)  | Lifestyle<br>(n=8,653) | Difference<br>surgery – lifestyle |
|-----------------------------------------------|------------------------|------------------------|-----------------------------------|
| Age (years)                                   | 41.5 (41.4 to 41.7)    | 40.4 (40.2 to 40.6)    | 1.1 (0.9 to 1.4)                  |
| Male sex                                      | 25.2 (24.6 to 25.8)    | 20.8 (20.1 to 21.5)    | 4.4 (3.5 to 5.3)                  |
| Weight (kg)                                   | 119.5 (119.2 to 119.7) | 119.7 (119.4 to 120.0) | -0.2 (-0.7 to 0.2)                |
| Baseline body-mass index (kg/m <sup>2</sup> ) | 41.4 (41.4 to 41.5)    | 41.3 (41.3 to 41.4)    | 0.1 (0.1 to 0.2)                  |
| One-year body-mass index (kg/m <sup>2</sup> ) | 29.2 (29.1 to 29.2)    | 29.7 (29.6 to 29.8)    | -0.5 (-0.6 to -0.4)               |
| Systolic blood pressure (mmHg)                | 135.0 (134.7 to 135.3) | 133.1 (132.8 to 133.4) | 1.9 (1.4 to 2.3)                  |
| Married (%)                                   | 43.0 (42.4 to 43.7)    | 45.7 (44.8 to 46.5)    | -2.6 (-3.7 to -1.5)               |
| Current smoker (%)                            | 15.5 (14.9 to 16.1)    | 16.5 (15.8 to 17.2)    | -1.0 (-2.0 to -0.04)              |
| Prior myocardial infarction (%)               | 1.0 (0.9 to 1.2)       | 0.7 (0.6 to 0.9)       | 0.3 (0.1 to 0.5)                  |
| Prior atrial fibrillation (%)                 | 1.0 (0.9 to 1.1)       | 0.4 (0.3 to 0.5)       | 0.6 (0.4 to 0.8)                  |
| Prior valve disease (%)                       | 0.2 (0.1 to 0.2)       | 0.0 (-0.0 to 0.01)     | 0.1 (0.1 to 0.2)                  |
| Prior substance abuse (%)                     | 0.8 (0.6 to 0.9)       | 0.6 (0.5 to 0.8)       | 0.1 (-0.1 to 0.3)                 |
| Lipid-lowering drugs (%)                      | 13.7 (13.2 to 14.1)    | 8.2 (7.7 to 8.7)       | 5.5 (4.8 to 6.2)                  |
| Antidiabetic drugs (%)                        | 14.0 (13.6 to 14.5)    | 7.7 (7.2 to 8.1)       | 6.4 (5.7 to 7.0)                  |
| Antihypertensive drugs (%)                    | 30.3 (29.7 to 30.9)    | 23.0 (22.2 to 23.7)    | 7.3 (6.4 to 8.3)                  |
| Education                                     |                        |                        |                                   |
| <10 years (%)                                 | 16.8 (16.3 to 17.3)    | 14.4 (13.9 to 14.9)    | 2.4 (1.8 to 3.0)                  |
| 10 to 12 years (%)                            | 61.8 (61.3 to 62.3)    | 61.0 (60.5 to 61.6)    | 0.8 (0.6 to 1.0)                  |
| >12 years (%)                                 | 21.4 (20.8 to 21.9)    | 24.6 (23.9 to 25.3)    | -3.2 (-4.0 to -2.4)               |
| Income (1000 USD/year)                        | 30.6 (30.4 to 30.9)    | 30.7 (30.3 to 40.0)    | -0.02 (-0.4 to 0.4)               |

Data are means or percent and difference between surgery and lifestyle groups (95% confidence intervals) from an inverse probability-weighted sample.

Supplemental Figure 1.

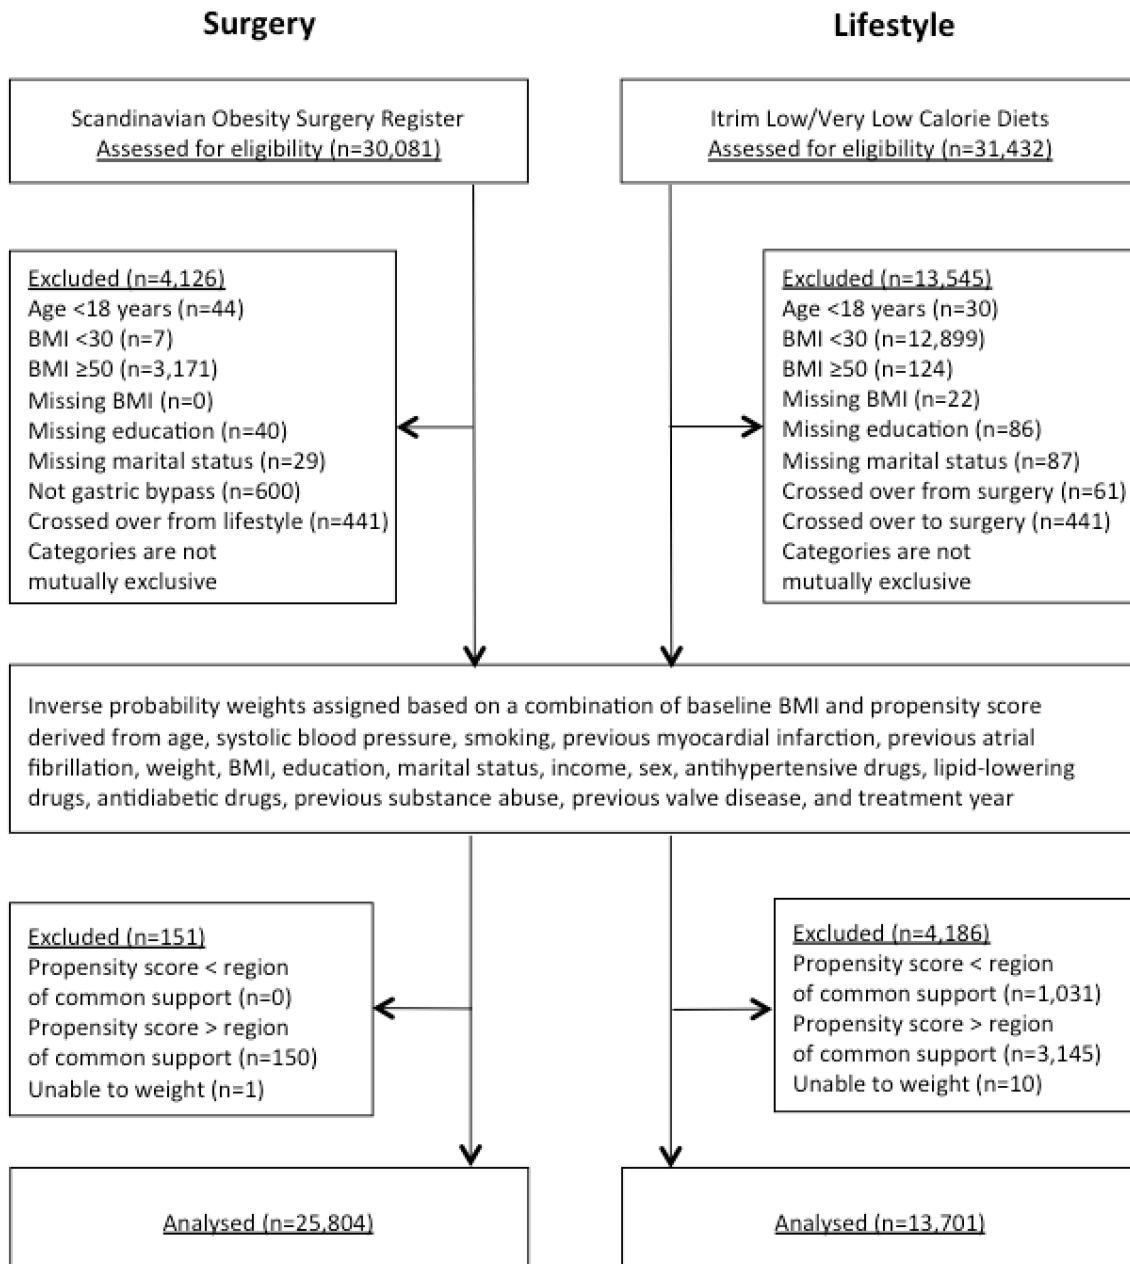

## **Supplemental Figure titles and legends**

### **Supplemental Figure 1.** Flow chart for definition of the study sample

Intervention years 2006-2013. BMI, body-mass index.
